# Supplementary material for: New layered nonlinear optical iodate Cs3Ta(IO3)8: topology-symmetry analysis and structure prediction
Source: Royal Society of Chemistry journal article supplement (doi:10.1039/d3ce00461a), 2023-01-01
Supplement: d3ce00461a1.pdf [file d3ce00461a1.pdf]

**Table S1.** Crystal data and structure refinement for Cs<sub>3</sub>Ta(IO<sub>3</sub>)<sub>8</sub>

|                                                                            |                                                   |
|----------------------------------------------------------------------------|---------------------------------------------------|
| Formula                                                                    | Cs <sub>3</sub> Ta(IO <sub>3</sub> ) <sub>8</sub> |
| Formula weight                                                             | 1978.88                                           |
| Crystal system                                                             | trigonal                                          |
| Space group, <i>Z</i>                                                      | <i>P</i> 31 <i>c</i> , 2                          |
| <i>a</i> , Å                                                               | 8.0774(1)                                         |
| <i>c</i> , Å                                                               | 23.4262(3)                                        |
| <i>V</i> , Å <sup>3</sup>                                                  | 1323.67(3)                                        |
| <i>D<sub>x</sub></i> , g/cm <sup>3</sup>                                   | 4.965                                             |
| <i>μ</i> , mm <sup>-1</sup>                                                | 17.642                                            |
| Wavelength, Å                                                              | 0.71073                                           |
| <i>θ</i> range/degree                                                      | 2.91- 30.87                                       |
| Refl. collected/unique/ <i>R</i> <sub>int</sub>                            | 21164 / 2644 / 0.0481                             |
| Completeness to <i>θ</i> , %                                               | 0.961                                             |
| Parameters                                                                 | 110                                               |
| <i>GOF</i> ( <i>S</i> )                                                    | 1.133                                             |
| <i>R</i> <sub>all</sub> , <i>R</i> <sub>gt</sub> , <i>R</i> <sub>wgt</sub> | 0.0384, 0.0361, 0.0873                            |
| <i>Δρ</i> <sub>min</sub> / <i>Δρ</i> <sub>max</sub> , e/Å <sup>3</sup>     | -7.066/ 1.682                                     |

$$^1 R_{gt} = \frac{\sum (|F_o| - |F_c|)}{\sum |F_o|} \text{ and } R_{wgt} = \left[ \frac{\sum w (F_o^2 - F_c^2)^2}{\sum w (F_o^2)^2} \right]^{1/2} \text{ for } F_o^2 > 2\sigma(F_o^2).$$

**Table S2.** Atomic coordinates and equivalent displacement parameters for Cs<sub>3</sub>Ta(IO<sub>3</sub>)<sub>8</sub>.

| Atom | <i>x/a</i> | <i>y/b</i> | <i>z/c</i>  | <i>U</i> <sub>eqv</sub> , Å <sup>2</sup> |
|------|------------|------------|-------------|------------------------------------------|
| I1   | 0.6667     | 0.3333     | 0.13162(5)  | 0.0196(2)                                |
| I2   | 0.88012(7) | 0.67265(7) | 0.26158(2)  | 0.0116(1)                                |
| I3   | 0.45888(8) | 0.00075(7) | 0.00020(2)  | 0.0124(1)                                |
| I4   | 0.0000     | 0.0000     | 0.12891(5)  | 0.0206(2)                                |
| Ta   | 0.6667     | 0.3333     | 0.38072(3)  | 0.0101(1)                                |
| Cs1  | 0.3333     | 0.6667     | 0.35321(6)  | 0.0290(3)                                |
| Cs2  | 0.3333     | 0.6667     | 0.15339(7)  | 0.0330(3)                                |
| Cs3  | 0.0000     | 0.0000     | -0.08599(6) | 0.0300(3)                                |
| O1   | 0.175(1)   | 0.214(1)   | 0.1656(3)   | 0.030(2)                                 |
| O2   | 0.774(1)   | 0.565(1)   | 0.3326(3)   | 0.018(1)                                 |
| O3   | 0.457(1)   | -0.102(1)  | -0.0728(3)  | 0.015(1)                                 |
| O4   | 0.934(1)   | 0.494(1)   | 0.2369(4)   | 0.023(1)                                 |
| O5   | 0.659(1)   | 0.529(1)   | 0.0964(4)   | 0.037(2)                                 |
| O6   | 0.410(1)   | 0.177(1)   | -0.0290(3)  | 0.022(1)                                 |
| O7   | 0.228(1)   | -0.177(1)  | 0.0242(3)   | 0.024(2)                                 |
| O8   | 0.105(1)   | 0.845(1)   | 0.2931(3)   | 0.022(2)                                 |

**Table S3.** Interatomic distances for Cs<sub>3</sub>Ta(IO<sub>3</sub>)<sub>8</sub>.

| <b>Bond</b>     | <b>Distance, Å</b> | <b>Bond</b>     | <b>Distance, Å</b> |
|-----------------|--------------------|-----------------|--------------------|
| I1 – O5 (x3)    | 1.812(8)           | I4 – O1 (x3)    | 1.810(8)           |
| Average I1 – O  | 1.812              | Average I5 – O  | 1.810              |
| I2 – O4         | 1.800(7)           | I3 – O7         | 1.784(7)           |
| I2 – O8         | 1.803(8)           | I3 – O6         | 1.792(7)           |
| I2 – O2         | 1.874(7)           | I3 – O3         | 1.896(6)           |
| Average I2 – O  | 1.826              | Average I3 – O  | 1.824              |
| Ta – O3 (x3)    | 1.952(6)           | Cs1 – O8 (x3)   | 3.178(8)           |
| Ta – O2 (x3)    | 1.978(6)           | Cs1 – O6 (x3)   | 3.299(8)           |
|                 |                    | Cs1 – O3 (x3)   | 3.504(6)           |
| Average Ta – O  | 1.965              | Average Cs1 – O | 3.327              |
| Cs2 – O1 (x3)   | 3.230(8)           | Cs3 – O6 (x3)   | 3.173(7)           |
| Cs2 – O4 (x3)   | 3.417(7)           | Cs3 – O8 (x3)   | 3.373(8)           |
| Cs2 – O7 (x3)   | 3.541(8)           | Cs3 – O2 (x3)   | 3.589(7)           |
| Average Cs2 – O | 3.396              | Average Cs3 – O | 3.378              |
